# Supplementary material for: Long-Term Outcomes after Use of Perioperative Glucocorticoids in Patients Undergoing Cancer Surgery: A Systematic Review and Meta-Analysis
Source: PubMed Central journal article supplement (PMC7017046; doi:10.3390/cancers12010076), 2019-12-27
Supplement: cancers-12-00076-s001.pdf [file cancers-12-00076-s001.pdf]

# Supplementary Materials: Long-Term Outcomes after Use of Perioperative Glucocorticoids in Patients Undergoing Cancer Surgery: A Systematic Review and Meta-Analysis

Emma Rosenkrantz Hölmich, Rune Petring Hasselager, Michael Tvilling Madsen, Adile Orhan and Ismail Gögenur

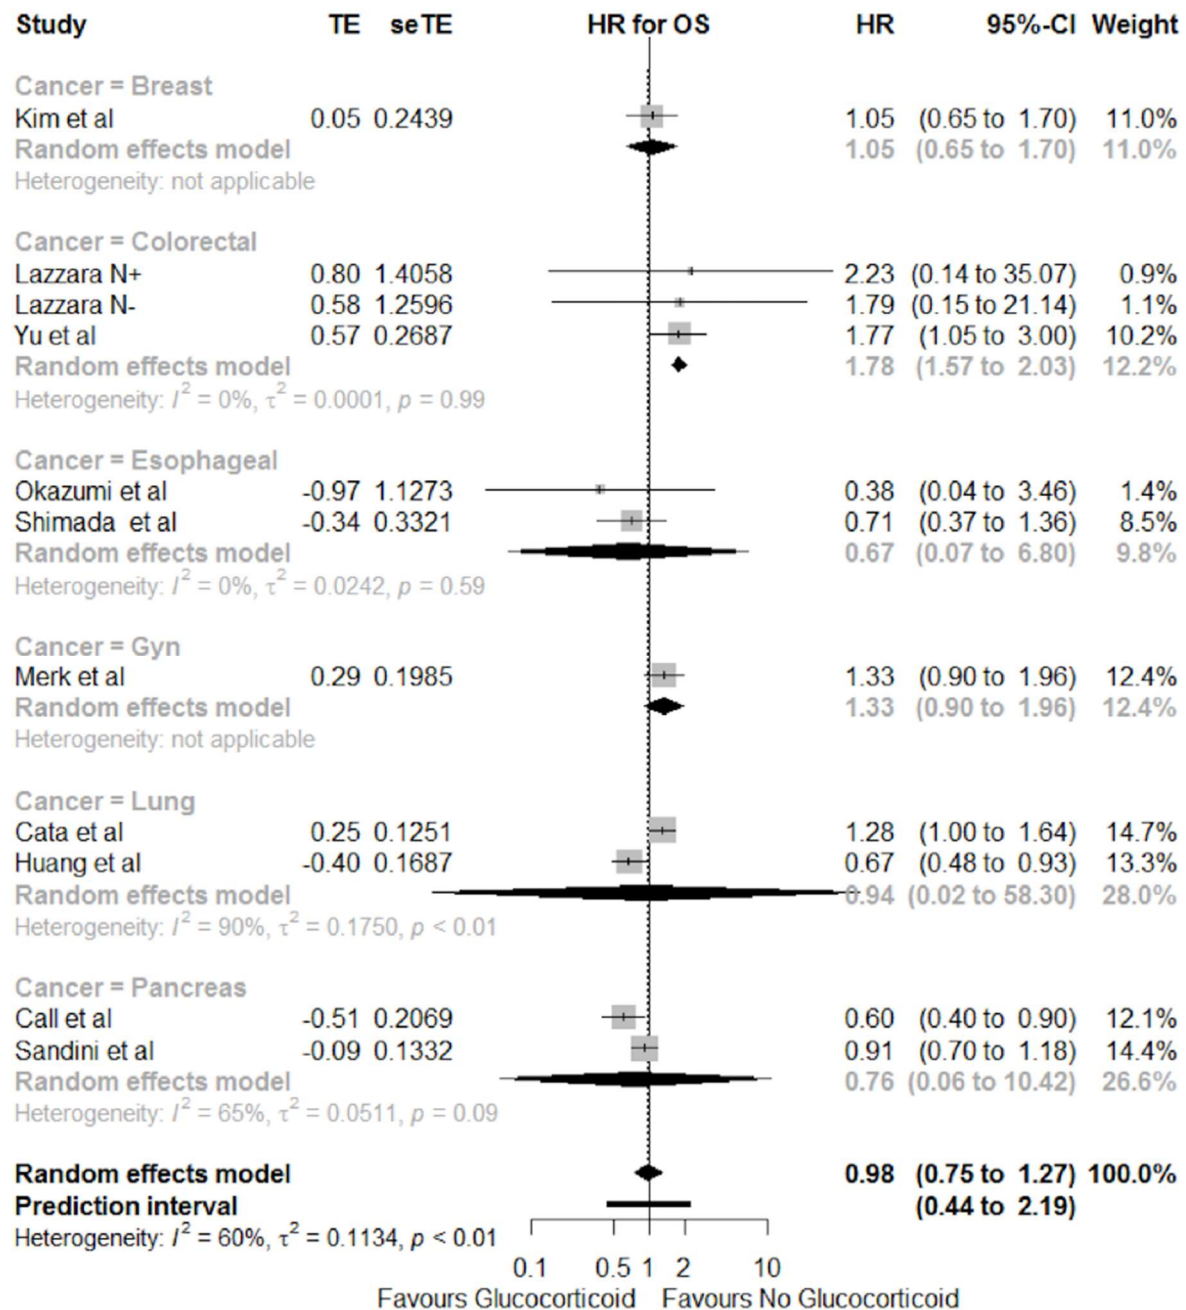

**Figure S1.** Forest plot of the unadjusted hazard-ratios for overall survival after cancer surgery according to cancer type, applying a random effect model on time-to-event data. CI = confidence interval; HR = hazard-ratio; OS = overall survival; TE =  $\ln(\text{HR})$ ; seTE = standard error for  $\ln(\text{HR})$ .

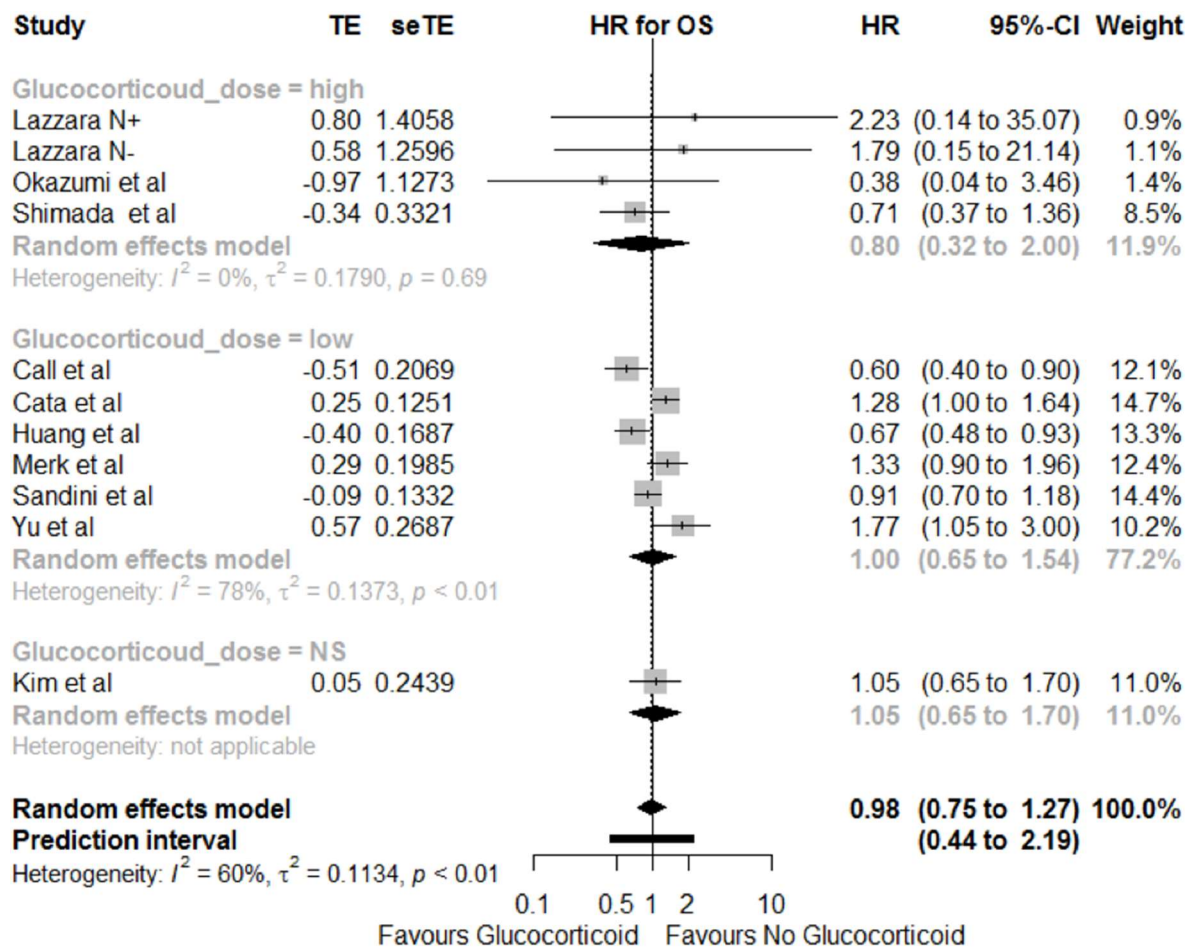

**Figure S2.** Forest plot of the unadjusted hazard-ratios for overall survival after cancer surgery according to dexamethasone dose (20 mg as cut-off), applying a random effect model on time-to-event data. CI = confidence interval; HR = hazard-ratio; OS = overall survival; TE = ln(HR); seTE = standard error for ln(HR).

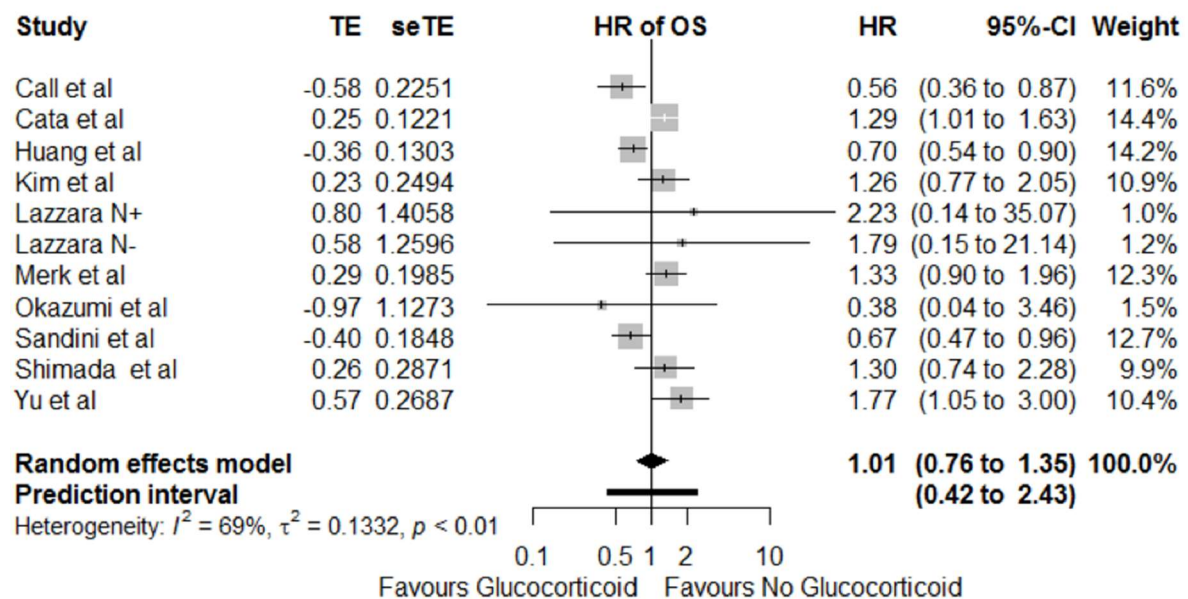

**Figure S3.** Forest plot of the adjusted hazard-ratios for overall survival after cancer surgery, applying a random effect model on time-to-event data (sensitivity analysis). CI = confidence interval; HR = hazard-ratio; OS = overall survival; TE = ln(HR); seTE = standard error for ln(HR).

**Table S1.** PubMed search string for systematic review about perioperative glucocorticoid treatment for cancer surgery and long-term outcomes, date of search: 27 March 2019.

((((((((((("Neoplasms"[Mesh]) OR "Surgical Oncology"[Mesh])) OR (((((((((((((((neoplasm) OR neoplasms) OR tumor) OR tumors) OR malignant) OR malignancy) OR malignancies) OR cancer) OR cancers) OR carcinoma) OR carcinomas) OR sarcoma) OR sarcomas) OR germinoma) OR germinomas) OR "oncologic surgery") OR "oncologic surgeries"))))))))

AND

((((((((((("General Surgery"[Mesh]) OR "Surgical Procedures, Operative"[Mesh])) OR (((((((((((((Surgery) OR Surgeries) OR "Surgical treatment") OR "Surgical treatments") OR "Surgical intervention") OR "Surgical interventions") OR "Surgical procedure") OR "Surgical procedures") OR Operation) OR Operations) OR "Operative treatment") OR "Operative treatments") OR "Operative procedure") OR "Operative procedures"))))))))

AND

((((((((((((((((((((((((((((((Betamethasone) OR Corticoids) OR Corticosteroid) OR Corticosterone) OR Cortisone) OR Dexamethasone) OR Fluprednisolone) OR Glucocorticoid) OR Glucocorticosteroid) OR Glucosteroid) OR Hydrocortisone) OR methylprednisolone) OR Prednisolone) OR Prednisone) OR Triamcinolone) OR Decadron) OR Cortef) OR Solucortef) OR Solu-cortef) OR Solu cortef) OR Cortef) OR Solumedrol) OR Solu-medrol) OR "Solu medrol") OR Medrol)) OR (((((((((((("Triamcinolone"[Mesh]) OR "Steroids"[Mesh]) OR "Prednisone"[Mesh]) OR "Prednisolone"[Mesh]) OR "Methylprednisolone"[Mesh]) OR "Hydrocortisone"[Mesh]) OR "Glucocorticoids"[Pharmacological Action]) OR "Glucocorticoids"[Mesh]) OR "Fluprednisolone"[Mesh]) OR "Dexamethasone"[Mesh]) OR "Cortisone"[Mesh]) OR "Corticosterone"[Mesh]) OR "Betamethasone"[Mesh]) OR "Adrenal Cortex Hormones"[Mesh]))))))))))))

**Table S2.** List of relevant foreign articles that could not be translated for eligibility evaluation for systematic review about perioperative glucocorticoid treatment for cancer surgery and long-term outcomes.

| <b>Author (Publication Year)</b> | <b>Study Title</b>                                                                                                                                     | <b>Language</b> |
|----------------------------------|--------------------------------------------------------------------------------------------------------------------------------------------------------|-----------------|
| Fukai et al (2002) [1]           | Therapeutic options which potentially cure patients with thymoma                                                                                       | Japanese        |
| Ohira et al (2015) [2]           | Perioperative steroid administration for colorectal cancer with synchronous unresectable hepatic metastases                                            | Japanese        |
| Yano et al (2005) [3]            | Prophylactic administration of steroid for interstitial pneumonia after pulmonary resection for lung cancer                                            | Japanese        |
| Takemura et al (1999) [4]        | Influence of corticosteroid preoperative administration for surgical stress of the oesophageal cancer patients during peri- and post-operative periods | Japanese        |

**Table S3.** List of contact attempts for systematic review about perioperative glucocorticoid treatment for cancer surgery and long-term outcomes.

| Author                            | Study Title (Year)                                                                                                                                                         | Comment                                                                                                |
|-----------------------------------|----------------------------------------------------------------------------------------------------------------------------------------------------------------------------|--------------------------------------------------------------------------------------------------------|
| Abou Zeid et al (2002) [5]        | Dolasetron decreases postoperative nausea and vomiting after breast surgery                                                                                                | Author contacted for potential long-term data but did not respond.                                     |
| Alkhamis et al (2014) [6]         | Postoperative immunosuppression markers and the occurrence of sepsis in patients with benign and malignant disease                                                         | Author contacted for potential long-term data but did not respond.                                     |
| Bononi et al (2010) [7]           | Incidence and circumstances of cervical hematoma complicating thyroidectomy and its relationship to postoperative vomiting                                                 | Author contacted for potential long-term data and responded but was unable to provide data.            |
| Chirila et al (2008) [8]          | Cortisone treatment in prevention of pharyngocutaneous fistula after total laryngectomy                                                                                    | Author contacted for potential long-term data but did not respond.                                     |
| Clayburgh et al (2017) [9]        | A randomized controlled trial of corticosteroids for pain after transoral robotic surgery                                                                                  | Author contacted for potential long-term data but did not respond.                                     |
| De Oliveira et al (2015) [10]     | Perioperative dexamethasone and the development of chronic postmastectomy pain a single-center observational cohort study                                                  | Author contacted for potential long-term data but did not respond.                                     |
| De Oliveira et al (2013) [11]     | Is dexamethasone associated with recurrence of ovarian cancer?                                                                                                             | Included study. Author contacted for potential survival data but did not respond.                      |
| Gomez-Hernandez et al (2010) [10] | Preoperative dexamethasone reduces postoperative pain, nausea and vomiting following mastectomy for breast cancer                                                          | Author contacted for potential long-term data but did not respond.                                     |
| Park et al (2012) [12]            | Efficacy of intraoperative, single-bolus corticosteroid administration to prevent postoperative acute respiratory failure after oesophageal cancer surgery                 | Author contacted for potential long-term data, but email address could not be reached.                 |
| DREAMS Trial (2017) [13]          | Dexamethasone versus standard treatment for postoperative nausea and vomiting in gastrointestinal surgery: randomised controlled trial (DREAMS trial)                      | Author contacted for potential long-term data and responded but was unable to provide data.            |
| McSorley et al (2018) [14]        | The impact of preoperative dexamethasone on long-term survival following surgery for colorectal cancer                                                                     | Author contacted for full article, as only the abstract was published, but was unable to provide this. |
| Takeuchi et al (2010) [15]        | Factors influencing the long-term survival in patients with esophageal cancer who underwent esophagectomy after chemoradiotherapy                                          | Author contacted for potential long-term data but did not respond.                                     |
| Zhai et al (2013) [16]            | Prospective randomized study of glucocorticoids in the impact of the liver function and the prognosis after hepatectomy of hepatocellular carcinoma                        | Author contacted for full article, as only the abstract was published, but did not respond.            |
| Kirdak et al (2008) [17]          | Does single, low-dose preoperative dexamethasone improve outcomes after colorectal surgery based on an enhanced recovery protocol? Double-blind, randomized clinical trial | Author contacted for potential long-term data and responded but was unable to provide data.            |

|                             |                                                                                                                                                                                                  |                                                                                                              |
|-----------------------------|--------------------------------------------------------------------------------------------------------------------------------------------------------------------------------------------------|--------------------------------------------------------------------------------------------------------------|
| Pulitano et al (2007) [18]  | Prospective randomized study of the benefits of preoperative corticosteroid administration on hepatic ischemia-reperfusion injury and cytokine response in patients undergoing hepatic resection | Author contacted for potential long-term data and responded but was unable to provide data.                  |
| Yamashita et al (2001) [19] | Effects of preoperative steroid administration on surgical stress in hepatic resection: prospective randomized trial                                                                             | Author contacted for potential long-term data but did not respond.                                           |
| Shimada et al (1996) [20]   | The effect of a perioperative steroid pulse on surgical stress in hepatic resection                                                                                                              | Author contacted for potential long-term data, but email address could not be reached.                       |
| Shimada et al (2000) [21]   | Clinical benefits of steroid therapy on surgical stress in patients with esophageal cancer                                                                                                       | Author contacted for potential long-term data but did not respond.                                           |
| Laaninen et al (2016) [22]  | Perioperative hydrocortisone reduces major complications after pancreaticoduodenectomy: a randomized controlled trial                                                                            | Author contacted for potential long-term data and responded but was unable to provide data.                  |
| Bolac et al (2013) [23]     | The impact of postoperative nausea and vomiting prophylaxis with dexamethasone on postoperative wound complications in patients undergoing laparotomy for endometrial cancer                     | Author contacted for potential long-term data and responded but was unable to provide data.                  |
| Yano et al (2005) [24]      | Is preoperative methylprednisolone beneficial for patients undergoing esophagectomy?                                                                                                             | Included study. Author contacted, as recurrence data was not shown in article, and was able to provide data. |
| Shimada et al (2004) [25]   | Effect of steroid therapy on postoperative course and survival of patients with thoracic esophageal carcinoma                                                                                    | Included study. Author contacted, as recurrence data was not shown in article, but did not respond.          |
| Okazumi et al (2004) [26]   | Development of less invasive surgical procedures for thoracic esophageal cancer                                                                                                                  | Included study. Author contacted for additional analyses, but email address could not be reached.            |
| Gan et al (2015) [27]       | Perioperative immunomodulatory therapy does not decrease postoperative recurrence rate of rectal cancer                                                                                          | Included study. Author contacted for recurrence and survival data, but did not respond?                      |
| Takeda et al (2003) [28]    | Preoperative administration of methylprednisolone attenuates cytokine-induced respiratory failure after esophageal resection                                                                     | Author contacted for potential long-term data but did not respond?                                           |

**Table S4.** Results of individual studies included in systematic review about perioperative glucocorticoid treatment for cancer surgery and long-term outcomes for (a) recurrence, (b) unadjusted overall survival, (c) adjusted overall survival (d) disease-free survival and (e) cancer-specific survival.

**a**

**Non-randomised studies:**

| Author (Publication Year)     | n    | Glucocorticoid (n) | 1-Year Recurrence (n) |         | 3-Year Recurrence (n) |         | 5-Year Recurrence (n) |         | HR    | 95% CI    | Data Source                                                              |
|-------------------------------|------|--------------------|-----------------------|---------|-----------------------|---------|-----------------------|---------|-------|-----------|--------------------------------------------------------------------------|
|                               |      |                    | Glucocorticoid        | Control | Glucocorticoid        | Control | Glucocorticoid        | Control |       |           |                                                                          |
| De Oliveira et al (2014) [11] | 260  | 102                | 39                    | 55      | 57                    | 99      | 66                    | 110     | 1.02  | 0.77–1.35 | Kaplan-Meier curve                                                       |
| Kim et al (2019) [29]         | 2628 | 236                | 4                     | 55      | 17                    | 152     | 26                    | 204     | 1.348 | 0.91–1.99 | Pre-propensity competing risk univariate analysis and Kaplan-Meier curve |
| Lazzara et al N+ (2018) [30]  | 90   | 26                 | 3                     | 9       | 8                     | 15      | -                     | -       | 0.88  | 0.25–3.15 | Kaplan-Meier curve                                                       |
| Lazzara et al N- (2018) [30]  | 159  | 35                 | 1                     | 4       | 6                     | 17      | -                     | -       | 2.76  | 0.94–8.12 | Kaplan-Meier curve                                                       |
| Merk et al (2016) [31]        | 309  | 107                | 15                    | 29      | 29                    | 49      | 31                    | 58      | 0.99  | 0.62–1.59 | Univariate analysis and Kaplan-Meier curve                               |
| Yano et al (2005) [24]        | 40   | 20                 | 4                     | 5       | 10                    | 7       | 12                    | 8       | -     | -         | Raw data provided by author                                              |

Abbreviations: n = number of participants; Glucocorticoid = glucocorticoid group; Control = control group; HR = hazard ratio; CI = confidence interval.

**Randomised controlled trials:**

| Author (Publication Year) | n   | Glucocorticoid (n) | 1-Year Recurrence (n) |         | 3-Year Recurrence (n) |         | 5-Year Recurrence (n) |         | HR | 95% CI | Data Source |
|---------------------------|-----|--------------------|-----------------------|---------|-----------------------|---------|-----------------------|---------|----|--------|-------------|
|                           |     |                    | Glucocorticoid        | Control | Glucocorticoid        | Control | Glucocorticoid        | Control |    |        |             |
| Gan et al (2015) [27]     | 100 | 50                 | -                     | -       | -                     | -       | -                     | -       | -  | -      | -           |

Abbreviations: n = number of participants; Glucocorticoid = glucocorticoid group; Control = control group; HR = hazard ratio; CI = confidence interval.

**b**

**Non-randomised studies:**

| Author (Publication Year) | n | Glucocorticoid (n) | 1-Year Survival (n) |         | 3-Year Survival (n) |         | 5-Year Survival (n) |         | HR | 95% CI | Data Source |
|---------------------------|---|--------------------|---------------------|---------|---------------------|---------|---------------------|---------|----|--------|-------------|
|                           |   |                    | Glucocorticoid      | Control | Glucocorticoid      | Control | Glucocorticoid      | Control |    |        |             |

|                              |      |     |    |     |    |     |     |     |       |            |                                                               |
|------------------------------|------|-----|----|-----|----|-----|-----|-----|-------|------------|---------------------------------------------------------------|
| Call et al (2015) [32]       | 144  | 69  | 14 | 27  | 46 | 62  | 55  | 68  | 0.60  | 0.40–0.90  | Kaplan-Meier curve and Univariate analysis                    |
| Cata et al (2016) [33]       | 1549 | 439 | 15 | 72  | 70 | 247 | 114 | 354 | 1.284 | 1.01–1.63  | Kaplan-Meier curve and pre-propensity multivariate analysis   |
| Huang et al (2018) [34]      | 588  | 332 | 21 | 6   | 59 | 25  | 83  | 41  | 0.67  | 0.48–0.93  | Multivariate CPH analysis and Kaplan-Meier curve              |
| Kim et al (2019) [29]        | 2628 | 236 | 1  | 20  | 10 | 70  | 13  | 131 | 1.051 | 0.65–1.70  | Multivariate analysis and Kaplan-Meier curve                  |
| Lazzara et al N+ (2018) [30] | 90   | 26  | 2  | 6   | 3  | 12  | -   | -   | 2.23  | 0.14–34.63 | Kaplan-Meier curve                                            |
| Lazzara et al N- (2018) [30] | 159  | 35  | 1  | 10  | 1  | 14  | -   | -   | 1.79  | 0.15–20.92 | Kaplan-Meier curve                                            |
| Merk et al (2016) [31]       | 309  | 107 | 6  | 16  | 23 | 40  | 34  | 59  | 1.33  | 0.90–1.96  | Kaplan-Meier curve                                            |
| Okazumi et al (2004) [26]    | 37   | 19  | 2  | 5   | 4  | 9   | 6   | 9   | 0.38  | 0.04–3.32  | Kaplan-Meier curve and survival rate calculation              |
| Sandini et al (2018) [35]    | 497  | 81  | 15 | 126 | 37 | 274 | 56  | 318 | 0.91  | 0.70–0.18  | Pre-propensity cox regression analysis and Kaplan-Meier curve |
| Shimada et al (2004) [25]    | 141  | 78  | 6  | 9   | 19 | 26  | 27  | 29  | 0.71  | 0.37–1.36  | Adjusted CPH model and Kaplan-Meier curve                     |
| Yu et al (2015) [36]         | 515  | 75  | 3  | 10  | 19 | 76  | 38  | 120 | 1.77  | 1.05–3.01  | Univariate analysis and Kaplan-Meier curve                    |

Abbreviations: *n* = number of participants; Gluco = glucocorticoid group; Control = control group; HR = hazard ratio; CI = confidence interval.

**Randomised controlled trials:**

| Author (Publication Year) | <i>n</i> | Gluco ( <i>n</i> ) | 1-Year Survival ( <i>n</i> ) |         | 3-Year Survival ( <i>n</i> ) |         | 5-Year Survival ( <i>n</i> ) |         | HR   | 95% CI    | Data Source        |
|---------------------------|----------|--------------------|------------------------------|---------|------------------------------|---------|------------------------------|---------|------|-----------|--------------------|
|                           |          |                    | Gluco                        | Control | Gluco                        | Control | Gluco                        | Control |      |           |                    |
| Gan et al (2015) [27]     | 100      | 50                 | -                            | -       | -                            | -       | -                            | -       | -    | -         | -                  |
| Sato et al (2002) [37]    | 66       | 33                 | 4                            | 4       | 13                           | 12      | -                            | -       | 1.02 | 0.22–4.77 | Kaplan-Meier curve |
| Singh et al (2014) [38]   | 43       | 20                 | 1                            | 0       | 2                            | 4       | 7                            | 4       | 1.99 | 0.61–6.46 | Kaplan-Meier curve |



|                        |    |    |   |   |    |   |    |   |      |           |                                            |
|------------------------|----|----|---|---|----|---|----|---|------|-----------|--------------------------------------------|
| Yano et al (2005) [24] | 40 | 20 | 6 | 5 | 10 | 8 | 14 | 9 | 1.27 | 0.31–5.13 | Univariate analysis and Kaplan-Meier curve |
|------------------------|----|----|---|---|----|---|----|---|------|-----------|--------------------------------------------|

Abbreviations: *n* = number of participants; Gluco = glucocorticoid group; Control = control group; HR = hazard ratio; CI = confidence interval.

**c**

**Non-randomised studies:**

| Author (Publication Year)    | <i>n</i> | Gluco<br>( <i>n</i> ) | 1-Year Survival<br>( <i>n</i> ) |         | 3-Year Survival<br>( <i>n</i> ) |         | 5-Year Survival<br>( <i>n</i> ) |         | HR    | 95% CI     | Data Source                                                 |
|------------------------------|----------|-----------------------|---------------------------------|---------|---------------------------------|---------|---------------------------------|---------|-------|------------|-------------------------------------------------------------|
|                              |          |                       | Gluco                           | Control | Gluco                           | Control | Gluco                           | Control |       |            |                                                             |
| Call et al (2015) [39]       | 144      | 69                    | 14                              | 27      | 46                              | 62      | 55                              | 68      | 0.56  | 0.36–0.87  | Kaplan-Meier curve and Multivariate model 2                 |
| Cata et al (2016) [33]       | 1549     | 439                   | 15                              | 72      | 70                              | 247     | 114                             | 354     | 1.286 | 1.01–1.63  | Kaplan-Meier curve and pre-propensity multivariate analysis |
| Huang et al (2018) [34]      | 588      | 332                   | 21                              | 6       | 59                              | 25      | 83                              | 41      | 0.70  | 0.54–0.90  | Multivariate CPH analysis and Kaplan-Meier curve            |
| Kim et al (2019) [29]        | 2628     | 236                   | 1                               | 20      | 10                              | 70      | 13                              | 131     | 1.256 | 0.77–2.047 | Multivariate analysis and Kaplan-Meier curve                |
| Lazzara et al N+ (2018) [30] | 90       | 26                    | 2                               | 6       | 3                               | 12      | -                               | -       | 2.23  | 0.14–34.63 | Kaplan-Meier curve                                          |
| Lazzara et al N- (2018) [30] | 159      | 35                    | 1                               | 10      | 1                               | 14      | -                               | -       | 1.79  | 0.15–20.92 | Kaplan-Meier curve                                          |

|                           |     |     |    |     |    |     |    |     |      |           |                                                               |
|---------------------------|-----|-----|----|-----|----|-----|----|-----|------|-----------|---------------------------------------------------------------|
| Merk et al (2016) [31]    | 309 | 107 | 6  | 16  | 23 | 40  | 34 | 59  | 1.33 | 0.90–1.96 | Kaplan-Meier curve                                            |
| Okazumi et al (2004) [26] | 37  | 19  | 2  | 5   | 4  | 9   | 6  | 9   | 0.38 | 0.04–3.32 | Kaplan-Meier curve and survival rate calculation              |
| Sandini et al (2018) [35] | 497 | 81  | 15 | 126 | 37 | 274 | 56 | 318 | 0.67 | 0.47–0.97 | Pre-propensity cox regression analysis and Kaplan-Meier curve |
| Shimada et al (2004) [25] | 141 | 78  | 6  | 9   | 19 | 26  | 27 | 29  | 1.30 | 0.74–2.28 | Adjusted CPH model and Kaplan-Meier curve                     |
| Yu et al (2015) [36]      | 515 | 75  | 3  | 10  | 19 | 76  | 38 | 120 | 1.77 | 1.05–3.01 | Univariate analysis and Kaplan-Meier curve                    |

Abbreviations: *n* = number of participants; Gluco = glucocorticoid group; Control = control group; HR = hazard ratio; CI = confidence interval.

**Randomised controlled trials**

| Author (Publication Year) | n   | Glucocorticoid (n) | 1-Year Survival (n) |         | 3-Year Survival (n) |         | 5-Year Survival (n) |         | HR   | 95% CI    | Data Source                                |
|---------------------------|-----|--------------------|---------------------|---------|---------------------|---------|---------------------|---------|------|-----------|--------------------------------------------|
|                           |     |                    | Glucocorticoid      | Control | Glucocorticoid      | Control | Glucocorticoid      | Control |      |           |                                            |
| Gan et al (2015) [27]     | 100 | 50                 | -                   | -       | -                   | -       | -                   | -       | -    | -         | -                                          |
| Sato et al (2002) [37]    | 66  | 33                 | 4                   | 4       | 13                  | 12      | -                   | -       | 1.02 | 0.22–4.77 | Kaplan-Meier curve                         |
| Singh et al (2014) [38]   | 43  | 20                 | 1                   | 0       | 2                   | 4       | 7                   | 4       | 1.99 | 0.61–6.46 | Kaplan-Meier curve                         |
| Yano et al (2005) [24]    | 40  | 20                 | 6                   | 5       | 10                  | 8       | 14                  | 9       | 1.27 | 0.31–5.13 | Univariate analysis and Kaplan-Meier curve |

Abbreviations: n = number of participants; Gluco = glucocorticoid group; Control = control group; HR = hazard ratio; CI = confidence interval.

**d**

**Retrospective cohort studies**

| Author (Publication Year) | n    | Glucocorticoid (n) | 1-Year Disease-Free Survival (n) |         | 3-Year Disease-Free Survival (n) |         | 5-Year Disease-Free Survival (n) |         | HR    | 95% CI    | Data Source                                           |
|---------------------------|------|--------------------|----------------------------------|---------|----------------------------------|---------|----------------------------------|---------|-------|-----------|-------------------------------------------------------|
|                           |      |                    | Glucocorticoid                   | Control | Glucocorticoid                   | Control | Glucocorticoid                   | Control |       |           |                                                       |
| Cata et al (2016) [33]    | 1549 | 439                | 56                               | 196     | 129                              | 393     | 168                              | 506     | 1.185 | 0.98–1.44 | Nonmatched univariate analysis and Kaplan-Meier curve |
| Huang et al (2018) [34]   | 588  | 332                | -                                | -       | -                                | -       | -                                | -       | 0.70  | 0.55–0.89 | Multivariate CPH model                                |
| Merk et al (2016) [31]    | 309  | 107                | 17                               | 38      | 40                               | 63      | 46                               | 81      | 1.32  | 0.94–1.85 | Kaplan-Meier curve                                    |
| Yu et al (2015) [36]      | 515  | 75                 | 3                                | 12      | 29                               | 124     | 53                               | 202     | 1.59  | 1.05–2.39 | Univariate analysis and Kaplan-Meier curve            |
| Zhu et al (2017) [39]     | 303  | 94                 | -                                | -       | -                                | -       | -                                | -       | 0.712 | 0.55–0.97 | Multivariate CPH model                                |

Abbreviations: n = number of participants; Gluco = glucocorticoid group; Control = control group; HR = hazard ratio; CI = confidence interval.

**Randomised controlled trials**

| Author (Publication Year) | <i>n</i> | Glucocorticoid (n) | 1-Year Disease-Free Survival (n) |         | 3-Year Disease-Free Survival (n) |         | 5-Year Disease-Free Survival (n) |         | HR | 95% CI | Data Source             |
|---------------------------|----------|--------------------|----------------------------------|---------|----------------------------------|---------|----------------------------------|---------|----|--------|-------------------------|
|                           |          |                    | Glucocorticoid                   | Control | Glucocorticoid                   | Control | Glucocorticoid                   | Control |    |        |                         |
|                           |          |                    | Singh et al (2014) [38]          | 43      | 20                               | 2       | 0                                | 5       |    |        |                         |
| Yano et al (2005) [24]    | 40       | 20                 | 5                                | 5       | 11                               | 8       | 13                               | 9       | -  | -      | Data provided by author |

Abbreviations: *n* = number of participants; Gluco = glucocorticoid group; Control = control group; HR = hazard ratio; CI = confidence interval

**e**

**Retrospective cohort studies**

| Author (Publication Year) | <i>n</i> | Glucocorticoid (n) | 1-Year Cancer-Specific Survival (n) |         | 3-Year Cancer-Specific Survival (n) |         | 5-Year Cancer-Specific Survival (n) |         | HR | 95% CI | Data Source |
|---------------------------|----------|--------------------|-------------------------------------|---------|-------------------------------------|---------|-------------------------------------|---------|----|--------|-------------|
|                           |          |                    | Glucocorticoid                      | Control | Glucocorticoid                      | Control | Glucocorticoid                      | Control |    |        |             |
|                           |          |                    | Shimada et al (2004) [25]           | 141     | 78                                  | 4       | 4                                   | 18      |    |        |             |

Abbreviations: *n* = number of participants; Gluco = glucocorticoid group; Control = control group; HR = hazard ratio; CI = confidence interval.

## References

1. Fukai, I.; Yamakawa, Y.; Kiriya, M.; Kaji, M.; Yano, T.; Sasaki, H.; Konishi, A.; Yukiue, H.; Fujii, Y. Therapeutic options which potentially cure patients with thymoma. *Kyobu Geka* **2002**, *55*, 959–964.
2. Ohira, G.; Miyauchi, H.; Narushima, K.; Kagaya, A.; Muto, Y.; Saito, H.; Matsubara, H. Perioperative Steroid Administration for Colorectal Cancer with Synchronous Unresectable Hepatic Metastases. *Gan to Kagaku Ryoho* **2015**, *42*, 1515–1517.
3. Yano, T.; Koga, T. Prophylactic administration of steroid for interstitial pneumonia after pulmonary resection for lung cancer. *Kyobu Geka* **2005**, *58*, 37–40.
4. Takemura, S.; Miya, K.; Takao, H.; Umamoto, T.; Saji, S. Influence of corticosteroid preoperative administration for surgical stress of the esophageal cancer patients during peri- and post-operative periods. *Jpn. J. Gastroenterol. Surg.* **1999**, *32*, 1133–1141, doi:10.5833/jjgs.32.1133.
5. Abou Zeid, H.; Al-Gahamdi, A.; Abdul-Hadi, M. Dolasetron decreases postoperative nausea and vomiting after breast surgery. *Breast J. Anaesth.* **2002**, *8*, 216–221, doi:10.1046/j.1524-4741.2002.08405.x.
6. Alkhamis, T.; Ivic, D.; Wagner, J.; Ivic, J.; Dobrosevic, B.; Turina, I.; Kralik, K.; Barbic, J. Postoperative immunosuppression markers and the occurrence of sepsis in patients with benign and malignant disease. *Wien. Klin. Wochenschr.* **2014**, *126*, 774–784, doi:10.1007/s00508-014-0613-6.
7. Bononi, M.; Amore Bonapasta, S.; Vari, A.; Scarpini, M.; De Cesare, A.; Miccini, M.; Meucci, M.; Tocchi, A. Incidence and circumstances of cervical hematoma complicating thyroidectomy and its relationship to postoperative vomiting. *Head Neck* **2010**, *32*, 1173–1177, doi:10.1002/hed.21313.
8. Chirilă, M.; Bolboacă, S.; Tomescu, E.; Revesz, A.; Matic, A.; Stamate, M.; Franduş, I. Cortisone treatment in prevention of pharyngocutaneous fistula after total laryngectomy. *Chirurgia* **2008**, *103*, 553–557.
9. Clayburgh, D.; Stott, W.; Bolognone, R.; Palmer, A.; Achim, V.; Troob, S.; Li, R.; Brickman, D.; Graville, D.; Andersen, P.; et al. A randomized controlled trial of corticosteroids for pain after transoral robotic surgery. *Laryngoscope* **2017**, *127*, 2558–2564, doi:10.1002/lary.26625.
10. De Oliveira, G.S.; Bialek, J.M.; Turan, A.; McCarthy, R.J.; Sessler, D.I. Perioperative dexamethasone and the development of chronic postmastectomy pain: a single-center observational cohort study. *Reg. Anesth. Pain Med.* **2015**, *40*, 539–544, doi:10.1097/aap.0000000000000301.
11. De Oliveira, G.S., Jr.; McCarthy, R.; Turan, A.; Schink, J.C.; Fitzgerald, P.C.; Sessler, D.I. Is dexamethasone associated with recurrence of ovarian cancer? *Anesth. Analg.* **2014**, *118*, 1213–1218, doi:10.1213/ANE.0b013e3182a5d656.
12. Park, S.Y.; Lee, H.S.; Jang, H.J.; Joo, J.; Zo, J.I. Efficacy of intraoperative, single-bolus corticosteroid administration to prevent postoperative acute respiratory failure after esophageal cancer surgery. *Interact. Cardiovasc. Thorac. Surg.* **2012**, *15*, 639–643, doi:10.1093/icvts/ivs167.
13. DREAMS Trial Collaborators and West Midlands Research Collaborative. Dexamethasone versus standard treatment for postoperative nausea and vomiting in gastrointestinal surgery: Randomised controlled trial (DREAMS Trial). *BMJ* **2017**, *357*, j1455, doi:10.1136/bmj.j1455.
14. McSorley, S.; Khor, B.Y.; Roxburgh, C.; Horgan, P.; McMillan, D. The impact of preoperative dexamethasone on long-term survival following surgery for colorectal cancer. *J. Clin. Oncol.* **2018**, *36*, doi:10.1200/JCO.2018.36.4\_suppl.644.
15. Takeuchi, H.; Saikawa, Y.; Oyama, T.; Ozawa, S.; Suda, K.; Wada, N.; Takahashi, T.; Nakamura, R.; Shigematsu, N.; Ando, N.; et al. Factors influencing the long-term survival in patients with esophageal cancer who underwent esophagectomy after chemoradiotherapy. *World J. Surg.* **2010**, *34*, 277–284, doi:10.1007/s00268-009-0331-9.
16. Zhai, J.; Cai, X.; Qu, S.P.; Zhang, Y.J.; Chen, X.T.; Wu, D. Prospective randomized study of glucocorticoids in the impact of the liver function and the prognosis after hepatectomy of hepatocellular carcinoma. *HPB* **2013**, *15*, 231, doi:10.1111/hpb.12093.
17. Kirdak, T.; Yilmazlar, A.; Cavun, S.; Ercan, I.; Yilmazlar, T. Does single, low-dose preoperative dexamethasone improve outcomes after colorectal surgery based on an enhanced recovery protocol? Double-blind, randomized clinical trial. *Am. Surg.* **2008**, *74*, 160–167.

18. Pulitanò, C.; Aldrighetti, L.; Arru, M.; Finazzi, R.; Soldini, L.; Catena, M.; Ferla, G. Prospective randomized study of the benefits of preoperative corticosteroid administration on hepatic ischemia-reperfusion injury and cytokine response in patients undergoing hepatic resection. *HPB* **2007**, *9*, 183–189, doi:10.1080/13651820701216984.
19. Yamashita, Y.; Shimada, M.; Hamatsu, T.; Rikimaru, T.; Tanaka, S.; Shirabe, K.; Sugimachi, K. Effects of preoperative steroid administration on surgical stress in hepatic resection: Prospective randomized trial. *Arch. Surg.* **2001**, *136*, 328–333, doi:10.1001/archsurg.136.3.328.
20. Shimada, M.; Saitoh, A.; Kano, T.; Takenaka, K.; Sugimachi, K. The effect of a perioperative steroid pulse on surgical stress in hepatic resection. *Int. Surg.* **1996**, *81*, 49–51.
21. Shimada, H.; Ochiai, T.; Okazumi, S.; Matsubara, H.; Nabeya, Y.; Miyazawa, Y.; Arima, M.; Funami, Y.; Hayashi, H.; Takeda, A.; et al. Clinical benefits of steroid therapy on surgical stress in patients with esophageal cancer. *Surgery* **2000**, *128*, 791–798, doi:10.1067/msy.2000.108614.
22. Laaninen, M.; Sand, J.; Nordback, I.; Vasama, K.; Laukkarinen, J. Perioperative hydrocortisone reduces major complications after pancreaticoduodenectomy: A randomized controlled trial. *Ann. Surg.* **2016**, *264*, 696–702, doi:10.1097/sla.0000000000001883.
23. Bolac, C.S.; Wallace, A.H.; Broadwater, G.; Havrilesky, L.J.; Habib, A.S. The impact of postoperative nausea and vomiting prophylaxis with dexamethasone on postoperative wound complications in patients undergoing laparotomy for endometrial cancer. *Anesth. Analg.* **2013**, *116*, 1041–1047, doi:10.1213/ANE.0b013e318276cf58.
24. Yano, M.; Taniguchi, M.; Tsujinaka, T.; Fujiwara, Y.; Yasuda, T.; Shiozaki, H.; Monden, M. Is preoperative methylprednisolone beneficial for patients undergoing esophagectomy? *Hepato Gastroenterol.* **2005**, *52*, 481–485. Retrieved from PubMed. (Accession No. 15816462).
25. Shimada, H.; Okazumi, S.; Matsubara, H.; Nabeya, Y.; Hayashi, H.; Shiratori, T.; Aoki, T.; Shuto, K.; Gunji, Y.; Ochiai, T. Effect of steroid therapy on postoperative course and survival of patients with thoracic esophageal carcinoma. *Esophagus* **2004**, *1*, 89–94, doi:10.1007/s10388-004-0014-4.
26. Okazumi, S.; Ochiai, T.; Shimada, H.; Matsubara, H.; Nabeya, Y.; Miyazawa, Y.; Shiratori, T.; Aoki, T.; Sugaya, M. Development of less invasive surgical procedures for thoracic esophageal cancer. *Dis. Esophagus* **2004**, *17*, 159–163, doi:10.1111/j.1442-2050.2004.00379.x.
27. Gan, Z.M.; Wang, X.D.; Lv, D.H.; Liu, D.; Li, L. Perioperative immunomodulatory therapy does not decrease postoperative recurrence rate of rectal cancer. *Nan Fang Yi Ke Da Xue Xue Bao* **2015**, *35*, 562–566, doi:10.3969/j.issn.1673-4254.2015.04.20.
28. Takeda, S.; Kim, C.; Ikezaki, H.; Nakanishi, K.; Sakamoto, A.; Okawa, K.; Miyashita, M.; Sasajima, K.; Tajiri, T.; Tanaka, K.; et al. Preoperative administration of methylprednisolone attenuates cytokine-induced respiratory failure after esophageal resection. *J. Nippon. Med. Sch.* **2003**, *70*, 16–20.
29. Kim, M.H.; Kim, D.W.; Park, S.; Kim, J.H.; Lee, K.Y.; Hwang, J.; Yoo, Y.C. Single dose of dexamethasone is not associated with postoperative recurrence and mortality in breast cancer patients: A propensity-matched cohort study. *BMC Cancer* **2019**, *19*, 251, doi:10.1186/s12885-019-5451-5.
30. Lazzara, C.; Cristina, D.; Iman, K.; Saverio, L.; Angela, A.; Giuseppe, N.; Giuseppe, C. Impact of preoperative corticosteroids on oncological outcomes following colorectal surgery for cancer. *Immunol. Endocr. Metab. Agents Med. Chem.* **2018**, *18*, 68–75, doi:10.2174/187152221801180905155822.
31. Merk, B.A.; Havrilesky, L.J.; Ehrisman, J.A.; Broadwater, G.; Habib, A.S. Impact of postoperative nausea and vomiting prophylaxis with dexamethasone on the risk of recurrence of endometrial cancer. *Curr. Med. Res. Opin.* **2016**, *32*, 453–458, doi:10.1185/03007995.2015.1123146.
32. Call, T.R.; Pace, N.L.; Thorup, D.B.; Maxfield, D.; Chortkoff, B.; Christensen, J.; Mulvihill, S.J. Factors associated with improved survival after resection of pancreatic adenocarcinoma: A multivariable model. *Anesthesiology* **2015**, *122*, 317–324, doi:10.1097/ALN.0000000000000489.
33. Cata, J.P.; Jones, J.; Sepesi, B.; Mehran, R.J.; Rodriguez-Restrepo, A.; Lasala, J.; Feng, L.; Gottumukkala, V. Lack of association between dexamethasone and long-term survival after non-small cell lung cancer surgery. *J. Cardiothorac. Vasc. Anesth.* **2016**, *30*, 930–935, doi:10.1053/j.jvca.2016.01.004.
34. Huang, W.W.; Zhu, W.Z.; Mu, D.L.; Ji, X.Q.; Nie, X.L.; Li, X.Y.; Wang, D.X.; Ma, D. Perioperative management may improve long-term survival in patients after lung cancer surgery: A retrospective cohort study. *Anesth. Analg.* **2018**, *126*, 1666–1674, doi:10.1213/ane.0000000000002886.

35. Sandini, M.; Ruscic, K.J.; Ferrone, C.R.; Warshaw, A.L.; Qadan, M.; Eikermann, M.; Lillemoe, K.D.; Fernandez-Del Castillo, C. Intraoperative dexamethasone decreases infectious complications after pancreaticoduodenectomy and is associated with long-term survival in pancreatic cancer. *Ann. Surg. Oncol.* **2018**, *25*, 4020–4026, doi:10.1245/s10434-018-6827-5.
36. Yu, H.C.; Luo, Y.X.; Peng, H.; Kang, L.; Huang, M.J.; Wang, J.P. Avoiding perioperative dexamethasone may improve the outcome of patients with rectal cancer. *Eur. J. Surg. Oncol.* **2015**, *41*, 667–673, doi:10.1016/j.ejso.2015.01.034.
37. Sato, N.; Koeda, K.; Ikeda, K.; Kimura, Y.; Aoki, K.; Iwaya, T.; Akiyama, Y.; Ishida, K.; Saito, K.; Endo, S. Randomized study of the benefits of preoperative corticosteroid administration on the postoperative morbidity and cytokine response in patients undergoing surgery for esophageal cancer. *Ann. Surg.* **2002**, *236*, 184–190, doi:10.1097/01.SLA.0000022025.67985.53.
38. Singh, P.P.; Lemanu, D.P.; Taylor, M.H.; Hill, A.G. Association between preoperative glucocorticoids and long-term survival and cancer recurrence after colectomy: Follow-up analysis of a previous randomized controlled trial. *Br. J. Anaesth.* **2014**, *113* (Suppl. 1), i68–i73, doi:10.1093/bja/aet577.
39. Zhu, W.Z.; Ji, X.Q.; Tan, H.Y. Retrospective cohort study of the association between perioperative factors and long-term survival after lung cancer operation. *Chin. J. Cancer Prev. Treat.* **2017**, *24*, 1387–1391, doi:10.16073/j.cnki.cjcpt.2017.19.011.

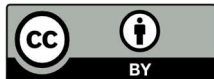

© 2020 by the authors. Licensee MDPI, Basel, Switzerland. This article is an open access article distributed under the terms and conditions of the Creative Commons Attribution (CC BY) license (<http://creativecommons.org/licenses/by/4.0/>).
